# Supplementary material for: Can Special Light Glasses Reduce Sleepiness and Improve Sleep of Nightshift Workers? A Placebo-Controlled Explorative Field Study
Source: PubMed Central journal article supplement (PMC7445845; doi:10.3390/clockssleep2020018), 2020-05-29
Supplement: clockssleep-02-00018-s001.pdf [file clockssleep-02-00018-s001.pdf]

Supplementary Material, Light exposure data from LightWatchers.

**Calibration of the LightWatchers.**

The obtained light exposure measurements were re-calibrated before analysis, to correct for inaccuracies and variation between devices. Specifically, for each device the directional and linear response were calculated and compared to a reference photometer (Hagner cell E4X). The results show large discrepancies between the devices and the reference meter for the response to simulated daylight of linearly decreasing illuminance, while the directional response corresponded to that of the reference meter. Thus, for each device a linear function was calculated, adjusting the device’s measurements in order to match with the measurements of the reference meter. These functions were then used to correct the lightlog measurements obtained in the present study in the case of daylight conditions (i.e., illuminance > 1000 lux and UVA > 0.4 μW/m<sup>2</sup>).

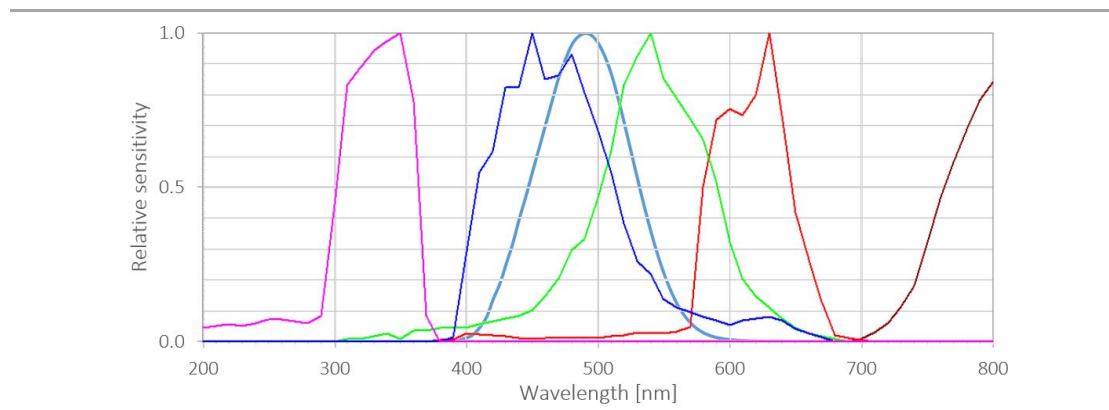

Figure S1 Relative spectral sensitivity of the five sensors (colored lines), action spectrum of melanopic irradiance (light blue dotted line). Pink = UV, Blue= 465nm, Green=540nm, Red=620nm, and brown=875nm.

Table S1. Results of the LightWatchers under treatment conditions

|                                             | Illuminance   | Mean min. > 10 lux / mean total | Mean min. > 1000 lux / mean total | UV 350 nm (mW/m <sup>2</sup> /nm) Mean ± SD | Bluish sensor 465 nm (mW/m <sup>2</sup> /nm) Mean ± SD | Greenish sensor 540 nm (mW/m <sup>2</sup> /nm) Mean ± SD | Reddish sensor 620 nm (mW/m <sup>2</sup> /nm) Mean ± SD | IR 875 nm (mW/m <sup>2</sup> /nm) Mean ± SD |
|---------------------------------------------|---------------|---------------------------------|-----------------------------------|---------------------------------------------|--------------------------------------------------------|----------------------------------------------------------|---------------------------------------------------------|---------------------------------------------|
| During nightshift (23:15-7:45h)             | 94±218        | 352 / 510                       | 1.1 / 510                         | 3.9·10 <sup>-2</sup> ±1.6·10 <sup>-1</sup>  | 7.6·10 <sup>-1</sup> ±1.7                              | 1.3±2.3                                                  | 1.1±2.0                                                 | 1.7·10 <sup>-1</sup> ±8.5·10 <sup>-1</sup>  |
| During last hour of nightshift (6:45-7:45h) | 132±47<br>2   | 43 / 60                         | 0.7 / 60                          | 6.7·10 <sup>-2</sup> ±4.1·10 <sup>-1</sup>  | 1.2±3.9                                                | 1.8±4.3                                                  | 1.5±4.0                                                 | 3.9·10 <sup>-1</sup> ±2.3                   |
| During 24h before first nightshift          | 1116±5<br>295 | 623 / 1440                      | 119 / 1440                        | 1.4±8.1                                     | 13±68                                                  | 14±73                                                    | 13±69                                                   | 7.0±39                                      |

|                                                             |               |               |               |                                               |                                               |                                               |                                               |                                               |  |
|-------------------------------------------------------------|---------------|---------------|---------------|-----------------------------------------------|-----------------------------------------------|-----------------------------------------------|-----------------------------------------------|-----------------------------------------------|--|
| (23:15-23:15h)                                              |               |               |               |                                               |                                               |                                               |                                               |                                               |  |
| During 24h after last nightshift (23:15-23:15h)             | 1150±5<br>270 | 666 /<br>1440 | 125 /<br>1440 | 1.6±7.8                                       | 13±61                                         | 13±66                                         | 13±63                                         | 7.0±35                                        |  |
| During 24h on First Night (23:15-23:15h)                    | 150±12<br>06  | 614 /<br>1440 | 21 /<br>1440  | 1.3·10 <sup>-1</sup><br>±1.6                  | 1.5±13                                        | 1.8±13                                        | 1.6±12                                        | 7.0·10 <sup>-1</sup><br>±6.6                  |  |
| During 24h on Night (23:15-23:15h)                          | 393±26<br>31  | 690 /<br>1440 | 50 /<br>1440  | 4.5·10 <sup>-1</sup><br>±3.6                  | 4.3±31                                        | 4.7±33                                        | 4.6±33                                        | 2.5±20                                        |  |
| During 24h on Last Night (23:15-23:15h)                     | 587±31<br>09  | 841 /<br>1440 | 89 /<br>1440  | 6.9·10 <sup>-1</sup><br>±3.9                  | 5.9±31                                        | 6.4±34                                        | 6.2±34                                        | 3.3±20                                        |  |
| During daytime indoors (6:00-18:00h)                        | 107±33<br>3   | 325 /<br>720  | 12 /<br>720   | 7.4·10 <sup>-2</sup><br>±5.4·10 <sup>-1</sup> | 1.5±6.0                                       | 1.7±6.4                                       | 1.7±6.1                                       | 8.4·10 <sup>-1</sup><br>±3.7                  |  |
| Between work and bed after nightshift                       | 898±24<br>14  | 48 /<br>60    | 11 / 60       | 9.1·10 <sup>-1</sup><br>±2.9                  | 9.8±24                                        | 10±24                                         | 8.9±22                                        | 4.7±13                                        |  |
| Between work and bed after nightshift (adj. for sunglasses) | 452±11<br>51  | 48 /<br>60    | 13 / 60       | 5.5·10 <sup>-2</sup><br>±3.4·10 <sup>-1</sup> | 1.0±3.4                                       | 3.5±7.5                                       | 6.4±17                                        | 4.7±13                                        |  |
| During 2h before bed on normal days                         | 188±16<br>22  | 46 /<br>120   | 1.7 /<br>120  | 1.1·10 <sup>-1</sup><br>±9.2·10 <sup>-1</sup> | 2.1±18                                        | 2.6±22                                        | 3.3±28                                        | 2.0±18                                        |  |
| During 2h before bed on nightshift days                     | 495±17<br>07  | 91 /<br>120   | 7.7 /<br>120  | 4.6·10 <sup>-1</sup><br>±2.2                  | 5.3±17                                        | 5.7±18                                        | 5.1±16                                        | 2.4±9.4                                       |  |
| During bed on normal days                                   | 8.0±55        | 39 /<br>480   | 0.0 /<br>480  | 8.3·10 <sup>-3</sup><br>±5.1·10 <sup>-2</sup> | 9.6·10 <sup>-2</sup><br>±6.6·10 <sup>-1</sup> | 1.2·10 <sup>-1</sup><br>±8.1·10 <sup>-1</sup> | 1.3·10 <sup>-1</sup><br>±8.7·10 <sup>-1</sup> | 6.1·10 <sup>-2</sup><br>±3.6·10 <sup>-1</sup> |  |

|                                        |           |           |           |                                            |                                            |                                            |                                            |                                            |
|----------------------------------------|-----------|-----------|-----------|--------------------------------------------|--------------------------------------------|--------------------------------------------|--------------------------------------------|--------------------------------------------|
| During bed on nightshift days          | 4.7±58    | 45 / 480  | 0.1 / 480 | 6.8·10 <sup>-3</sup> ±8.1·10 <sup>-2</sup> | 7.3·10 <sup>-2</sup> ±6.7·10 <sup>-1</sup> | 8.7·10 <sup>-2</sup> ±7.0·10 <sup>-1</sup> | 1.2·10 <sup>-1</sup> ±7.7·10 <sup>-1</sup> | 8.1·10 <sup>-2</sup> ±4.9·10 <sup>-1</sup> |
| During 2h after bed on normal days     | 1663±5875 | 100 / 120 | 9.0 / 120 | 2.0±8.4                                    | 20±76                                      | 21±81                                      | 20±75                                      | 10±41                                      |
| During 2h after bed on nightshift days | 1896±5995 | 97 / 120  | 13 / 120  | 2.6±9.3                                    | 23±79                                      | 24±85                                      | 24±84                                      | 14±49                                      |

Table S2 Results of the LightWatchers under placebo conditions

|                                                   | Illuminance | Mean min. > 10 lux / total min. | Mean min. > 1000 lux / total min. | UV 350 nm (mW/m <sup>2</sup> /nm) Mean ± SD | Bluish sensor 465 nm (mW/m <sup>2</sup> /nm) Mean ± SD | Greenish sensor 540 nm (mW/m <sup>2</sup> /nm) Mean ± SD | Reddish sensor 620 nm (mW/m <sup>2</sup> /nm) Mean ± SD | IR 875 nm (mW/m <sup>2</sup> /nm) Mean ± SD |
|---------------------------------------------------|-------------|---------------------------------|-----------------------------------|---------------------------------------------|--------------------------------------------------------|----------------------------------------------------------|---------------------------------------------------------|---------------------------------------------|
| During nightshift (23:15-7:45h)                   | 74±163      | 334 / 510                       | 0.8 / 510                         | 4.9·10 <sup>-2</sup> ±1.8·10 <sup>-1</sup>  | 6.9·10 <sup>-1</sup> ±1.5                              | 1.2±2.0                                                  | 9.5·10 <sup>-1</sup> ±1.6                               | 1.4·10 <sup>-1</sup> ±5.5·10 <sup>-1</sup>  |
| During last hour of nightshift (6:45-7:45h)       | 101±356     | 40 / 60                         | 0.5 / 60                          | 7.0·10 <sup>-2</sup> ±3.6·10 <sup>-1</sup>  | 1.0±3.3                                                | 1.4±3.4                                                  | 1.2±3.1                                                 | 2.9·10 <sup>-1</sup> ±1.5                   |
| During 24h before first nightshift (23:15-23:15h) | 1377±6397   | 614 / 1440                      | 126 / 1440                        | 2.5±12                                      | 17±89                                                  | 18±93                                                    | 17±88                                                   | 10±52                                       |
| During 24h after last nightshift (23:15-23:15h)   | 1255±5428   | 651 / 1440                      | 145 / 1440                        | 7.4±37                                      | 14±66                                                  | 15±70                                                    | 14±66                                                   | 2.3±10                                      |
| During 24h on First Night (23:15-23:15h)          | 444±2983    | 677 / 1440                      | 62 / 1440                         | 7.4·10 <sup>-1</sup> ±6.1                   | 5.1±40                                                 | 5.3±40                                                   | 4.9±38                                                  | 2.7±23                                      |
| During 24h on Night (23:15-23:15h)                | 165±1224    | 661 / 1440                      | 27 / 1440                         | 2.8·10 <sup>-1</sup> ±2.5                   | 2.5±24                                                 | 2.8±25                                                   | 2.6±25                                                  | 1.3±15                                      |
| During 24h on Last Night                          | 624±3564    | 812 / 1440                      | 82 / 1440                         | 9.8·10 <sup>-1</sup> ±6.2                   | 7.3±47                                                 | 7.7±49                                                   | 7.3±47                                                  | 4.0±27                                      |

|                                                             |               |              |              |                                               |                                               |                                               |                                               |                                                            |  |
|-------------------------------------------------------------|---------------|--------------|--------------|-----------------------------------------------|-----------------------------------------------|-----------------------------------------------|-----------------------------------------------|------------------------------------------------------------|--|
| (23:15-23:15h)                                              |               |              |              |                                               |                                               |                                               |                                               |                                                            |  |
| During daytime indoors (6:00-18:00h)                        | 122±80<br>7   | 322 /<br>720 | 12 /<br>720  | 2.3·10 <sup>-1</sup><br>±1.9                  | 1.8±15                                        | 2.1±16                                        | 2.0±16                                        | 1.0±9.4                                                    |  |
| Between work and bed after nightshift                       | 1274±4<br>206 | 49 /<br>60   | 10 / 60      | 1.5 ±6.2                                      | 13±45                                         | 14±46                                         | 12±42                                         | 6.4±25                                                     |  |
| Between work and bed after nightshift (adj. for sunglasses) | 839±32<br>42  | 49 /<br>60   | 14 / 60      | 6.2·10 <sup>-1</sup><br>±4.1                  | 5.2±32                                        | 7.5±33                                        | 9.7±37                                        | 6.4±25                                                     |  |
| During 2h before bed on normal days                         | 71±704        | 55 /<br>120  | 0.8 /<br>120 | 1.4·10 <sup>-1</sup><br>±1.1                  | 8.2·10 <sup>-1</sup><br>±6.6                  | 8.9·10 <sup>-1</sup><br>±6.8                  | 9.7·10 <sup>-1</sup><br>±6.3                  | 6.3·10 <sup>-1</sup><br>±3.7                               |  |
| During 2h before bed on nightshift days                     | 694±28<br>02  | 91 /<br>120  | 6.8 /<br>120 | 7.3·10 <sup>-1</sup><br>±3.8                  | 7.3±30                                        | 7.8±32                                        | 7.0±31                                        | 3.5±17                                                     |  |
| During bed on normal days                                   | 3.8±32        | 30 /<br>480  | 0.0 /<br>480 | 6.9·10 <sup>-3</sup><br>±1.8·10 <sup>-1</sup> | 4.0·10 <sup>-2</sup><br>±3.1·10 <sup>-1</sup> | 4.4·10 <sup>-2</sup><br>±3.4·10 <sup>-1</sup> | 4.8·10 <sup>-2</sup><br>±3.7·10 <sup>-1</sup> | 2.3·10 <sup>-2</sup><br>±2.0·10 <sup>-1</sup> <sub>1</sub> |  |
| During bed on nightshift days                               | 7.8±120       | 59 /<br>480  | 0.3 /<br>480 | 2.0·10 <sup>-2</sup><br>±3.0·10 <sup>-1</sup> | 9.8·10 <sup>-2</sup><br>±1.2                  | 1.1·10 <sup>-1</sup><br>±1.2                  | 1.3·10 <sup>-1</sup><br>±1.1                  | 7.6·10 <sup>-2</sup><br>±6.5·10 <sup>-1</sup> <sub>1</sub> |  |
| During 2h after bed on normal days                          | 1047±4<br>321 | 95 /<br>120  | 7.3 /<br>120 | 3.0±15                                        | 14±67                                         | 15±69                                         | 14±64                                         | 7.3±37                                                     |  |
| During 2h after bed on nightshift days                      | 1231±4<br>835 | 89 /<br>120  | 9.3 /<br>120 | 2.1±9.7                                       | 16±71                                         | 16±73                                         | 15±69                                         | 8.5±40                                                     |  |
